# Supplementary material
Source: Elsevier journal article supplement (https://www.sciencedirect.com/science/article/pii/S0300893223003998)

**Table 1 of the supplementary data.** Characteristics of the potentially eligible participants included and not included in the analysis

|                                    | Not included    | Included        | P      | Effect size | N    |
|------------------------------------|-----------------|-----------------|--------|-------------|------|
|                                    | n=2312          | n=6468          |        |             |      |
| Age, y                             | 53.6 ± 13.5     | 51.1 ± 12.3)    | < .001 | 0.201       | 8780 |
| Female sex                         | 1242 (53.7)     | 3595 (55.6)     | .128   | 0.016       | 8780 |
| Body mass index, kg/m <sup>2</sup> | 27.5 ± 4.81     | 26.9 ± 4.38     | < .001 | 0.134       | 8717 |
| Smoking                            |                 |                 | < .001 | 0.047       | 8670 |
| Never                              | 1189 (52.3)     | 3573 (55.8)     |        |             |      |
| Current or former < 1 y            | 634 (27.9)      | 1493 (23.3)     |        |             |      |
| Former > 1 y                       | 449 (19.8)      | 1332 (20.8)     |        |             |      |
| Diabetes mellitus                  | 231 (9.99)      | 431 (6.66)      | < .001 | 0.055       | 8780 |
| Glycemia, mg/dL                    | 96.0 [88.0;107] | 94.0 [87.0;103] | < .001 | 0.177       | 8557 |
| Hypertension                       | 1030 (45.4)     | 2343 (37.0)     | < .001 | 0.075       | 8597 |
| Systolic blood pressure, mmHg      | 129 ± 20.6      | 125 ± 18.9      | < .001 | 0.220       | 8753 |
| Diastolic blood pressure, mmHg     | 78.8 ± 10.6     | 78.1 ± 10.2     | .004   | 0.071       | 8742 |
| Total cholesterol, mg/dL           | 218 ± 43.1      | 214 ± 41.7      | < .001 | 0.099       | 8552 |
| LDL cholesterol, mg/dL             | 144 ± 39.0)     | 140 ± 37.1      | < .001 | 0.094       | 8322 |
| HDL cholesterol, mg/dL             | 52.3 ± 14.3     | 52.5 ± 13.4     | .523   | -0.016      | 8527 |
| Triglycerides, mg/dL               | 97.0 [70.0;135] | 89.0 [66.0;123] | < .001 | 0.113       | 8535 |

LDL, low density lipoprotein; HDL, high density lipoprotein.

Continuous traits distribution is shown as mean ± standard deviation or median [interquartile range: Quartile 1; Quartile 3]. Categorical traits are shown as No. (%).

**Effect size difference evaluation:**

- Categorical: Cramer’s V little if any association (< 0.1), low (< 0.3), moderate (< 0.5), high (>0.5) [<https://www.acastat.com/statbook/chisqassoc.htm>]
- Quantitative: Cohen’s d negligible (< 0.2), small (< 0.5), medium (< 0.8), large (>0.8)

**Table 2 of the supplementary data.** Clinical and carotid stiffness indices characteristics in the group of participants without and with an ischemic heart disease event in the follow-up.

|                                       | No events<br>n=6371 | Ischemic heart<br>disease<br>n=97 | P      | N    |
|---------------------------------------|---------------------|-----------------------------------|--------|------|
| <b>Clinical characteristics</b>       |                     |                                   |        |      |
| Age, y                                | 58.9 ± 12.0         | 66.8 ± 11.1                       | < .001 | 6468 |
| Female sex                            | 3559 (55.9)         | 36 (37.1)                         | < .001 | 6468 |
| Body mass index, kg/m <sup>2</sup>    | 27.2 ± 4.46         | 28.5 ± 4.58                       | .005   | 6462 |
| Smoking                               |                     |                                   | .094   | 6429 |
| Never                                 | 3494 (55.2)         | 43 (44.3)                         |        |      |
| Current or former < 1 y               | 1125 (17.8)         | 20 (20.6)                         |        |      |
| Former > 1 y                          | 1713 (27.1)         | 34 (35.1)                         |        |      |
| Diabetes mellitus                     | 566 (8.88)          | 22 (22.7)                         | < .001 | 6468 |
| Glycemia, mg/dL                       | 92.0 [85.8;101]     | 95.8 [87.7;107]                   | .002   | 6411 |
| Hypertension                          | 3058 (48.1)         | 73 (75.3)                         | < .001 | 6459 |
| Systolic blood pressure, mmHg         | 129 ± 19.6          | 137 ± 19.9                        | < .001 | 6466 |
| Diastolic blood pressure, mmHg        | 77.5 ± 10.1         | 79.9 ± 10.2                       | .025   | 6466 |
| Total cholesterol, mg/dL              | 207 ± 35.9          | 211 ± 39.8                        | .328   | 6411 |
| LDL cholesterol, mg/dL                | 134 ± 30.8          | 140 ± 35.5                        | .112   | 6343 |
| HDL cholesterol, mg/dL                | 53.4 ± 12.0         | 49.8 ± 10.6                       | .001   | 6411 |
| Triglycerides, mg/dL                  | 86.0 [63.0;118]     | 102 [74.8;126]                    | .006   | 6412 |
| <b>Carotid stiffness indices</b>      |                     |                                   |        |      |
| Strain x 100                          | 9.48 [7.96;11.1]    | 9.50 [7.29;11.2]                  | .441   | 6468 |
| Stiffness parameter                   | 5.65 [4.64;7.05]    | 6.34 [5.03;8.09]                  | .001   | 6467 |
| Peterson elasticity coefficient x 0.1 | 7.14 [5.67;9.23]    | 8.37 [6.60;10.9]                  | < .001 | 6467 |
| Compliance coefficient                | 0.82 [0.66;1.02]    | 0.79 [0.63;0.97]                  | .292   | 6468 |
| Distensibility coefficient x 1000     | 30.0 [23.2;38.0]    | 26.1 [19.0;32.3]                  | < .001 | 6466 |
| Pulse wave velocity                   | 5.75 [5.10;6.57]    | 6.21 [5.53;7.16]                  | < .001 | 6467 |

HDL, high density lipoprotein; LDL, low density lipoprotein.

Continuous traits distribution is shown as mean ± standard deviation or median [interquartile range: Quartile 1; Quartile 3]. Categorical traits are shown as No. (%).

**Table 3 of the supplementary data.** Clinical and carotid stiffness indices characteristics in the group of participants without and with a cerebrovascular event in the follow-up.

|                                       | No event         | Cerebrovascular disease | P      | N    |
|---------------------------------------|------------------|-------------------------|--------|------|
|                                       | n=6383           | n=85                    |        |      |
| <b>Clinical characteristics</b>       |                  |                         |        |      |
| Age, y                                | 58.9 ± 12.0      | 70.5 ± 10.3             | < .001 | 6468 |
| Female sex                            | 3554 (55.7)      | 41 (48.2)               | .207   | 6468 |
| Body mass index, kg/m <sup>2</sup>    | 27.2 ± 4.46      | 28.3 ± 4.73             | .032   | 6462 |
| Smoking                               |                  |                         | .143   | 6429 |
| Never                                 | 3483 (54.9)      | 54 (64.3)               |        |      |
| Current or former < 1 y               | 1136 (17.9)      | 9 (10.7)                |        |      |
| Former > 1 y                          | 1726 (27.2)      | 21 (25.0)               |        |      |
| Diabetes mellitus                     | 566 (8.87)       | 22 (25.9)               | < .001 | 6468 |
| Glycemia, mg/dL                       | 92.0 [85.9;101]  | 96.6 [91.1;115]         | < .001 | 6411 |
| Hypertension                          | 3064 (48.1)      | 67 (78.8)               | < .001 | 6459 |
| Systolic blood pressure, mmHg         | 129 ± 19.6       | 143 ± 20.1              | < .001 | 6466 |
| Diastolic blood pressure, mmHg        | 77.5 ± 10.1      | 79.6 ± 10.1             | .059   | 6466 |
| Total cholesterol, mmHg               | 207 ± 35.9       | 211 ± 39.1              | .342   | 6411 |
| LDL cholesterol, mmHg                 | 134 ± 30.8       | 138 ± 32.1              | .296   | 6343 |
| HDL cholesterol, mmHg                 | 53.4 ± 12.0      | 51.5 ± 12.3             | .176   | 6411 |
| Triglycerides, mmHg                   | 86.0 [63.0;118]  | 104 [76.8;130]          | .002   | 6412 |
| <b>Carotid stiffness indices</b>      |                  |                         |        |      |
| Strain x 100                          | 9.49 [7.97;11.1] | 8.20 [6.60;10.7]        | < .001 | 6468 |
| Stiffness parameter                   | 5.65 [4.63;7.04] | 7.50 [5.70;9.68]        | < .001 | 6467 |
| Peterson elasticity coefficient x 0.1 | 7.13 [5.67;9.21] | 10.2 [7.51;13.1]        | < .001 | 6467 |
| Compliance coefficient                | 0.82 [0.66;1.02] | 0.66 [0.55;0.87]        | < .001 | 6468 |
| Distensibility coefficient x 1000     | 30.1 [23.2;38.0] | 20.9 [16.2;29.8]        | < .001 | 6466 |
| Pulse wave velocity                   | 5.74 [5.10;6.56] | 6.88 [5.99;7.82]        | < .001 | 6467 |

HDL, high density lipoprotein; LDL, low density lipoprotein.

Continuous traits distribution is shown as mean ± standard deviation or median [interquartile range: Quartile 1; Quartile 3]. Categorical traits are shown as No. (%).

**Table 4 of the supplementary data.** Clinical and carotid stiffness indices characteristics in the group of participants without and with a fatal event in the follow-up.

|                                       | No event         | Mortality        | P      | N    |
|---------------------------------------|------------------|------------------|--------|------|
|                                       | n=6157           | n=311            |        |      |
| <b>Clinical characteristics</b>       |                  |                  |        |      |
| Age, y                                | 58.4 ± 11.8      | 72.0 ± 10.5      | < .001 | 6468 |
| Female sex                            | 3467 ± 56.3      | 128 ± 41.2       | < .001 | 6468 |
| Body mass index, kg/m <sup>2</sup>    | 27.2 ± 4.45      | 27.8 ± 4.61      | .020   | 6462 |
| Smoking                               |                  |                  | < .001 | 6429 |
| Never                                 | 3383 (55.3)      | 154 (49.5)       |        |      |
| Current or former < 1 y               | 1108 (18.1)      | 37 (11.9)        |        |      |
| Former > 1 y                          | 1627 (26.6)      | 120 (38.6)       |        |      |
| Diabetes mellitus                     | 503 (8.17)       | 85 (27.3)        | < .001 | 6468 |
| Glycemia, mg/dL                       | 92.0 [85.7;101]  | 98.0 [90.0;115]  | < .001 | 6411 |
| Hypertension                          | 2911 ± 47.3      | 220 ± 71.0       | < .001 | 6459 |
| Systolic blood pressure, mmHg         | 129 ± 19.5       | 139 ± 20.3       | < .001 | 6466 |
| Diastolic blood pressure, mmHg        | 77.6 ± 10.1      | 76.0 ± 10.5      | .009   | 6466 |
| Total cholesterol, mmHg               | 207 ± 35.7       | 202 ± 39.6       | .015   | 6411 |
| LDL cholesterol, mmHg                 | 134 ± 30.7       | 129 ± 33.4       | .011   | 6343 |
| HDL cholesterol, mmHg                 | 53.5 ± 12.0      | 51.4 ± 12.2      | .004   | 6411 |
| Triglycerides, mmHg                   | 86.0 [63.0;118]  | 95.0 [72.0;124]  | < .001 | 6412 |
| <b>Carotid stiffness indices</b>      |                  |                  |        |      |
| Strain x 100                          | 9.53 [8.01;11.1] | 8.64 [7.06;10.7] | < .001 | 6468 |
| Stiffness parameter                   | 5.60 [4.61;6.97] | 6.96 [5.75;8.59] | < .001 | 6467 |
| Peterson elasticity coefficient x 0.1 | 7.07 [5.65;9.10] | 9.22 [7.09;11.7] | < .001 | 6467 |
| Compliance coefficient                | 0.82 [0.66;1.02] | 0.71 [0.59;0.94] | < .001 | 6468 |
| Distensibility coefficient x 1000     | 30.3 [23.5;38.2] | 23.0 [18.2;30.7] | < .001 | 6466 |
| Pulse wave velocity                   | 5.72 [5.08;6.52] | 6.55 [5.72;7.49] | < .001 | 6467 |

HDL, high density lipoprotein; LDL, low density lipoprotein.

Continuous traits distribution is shown as mean ± standard deviation or median [interquartile range: Quartile 1; Quartile 3]. Categorical traits are shown as No. (%).

**Table 5 of the supplementary data.** Multivariate adjusted association between each of the carotid stiffness indices and the outcomes of interest considering competing risk in women

|                                                   | Strain<br><br>HR (95 % CI)<br>(per 0.01 units)   | Stiffness<br><br>HR (95%CI)<br>(per 1 unit)      | Peterson<br>elasticity<br>coefficient<br>HR (95%CI)<br>(per 10 units) | Compliance<br>coefficient<br>HR (95%CI)<br>(per 1 unit) | Distensibility<br>coefficient<br>HR (95%CI)<br>(per 0.001 units) | Pulse wave<br>velocity<br>HR (95%CI)<br>(per 1 unit) |
|---------------------------------------------------|--------------------------------------------------|--------------------------------------------------|-----------------------------------------------------------------------|---------------------------------------------------------|------------------------------------------------------------------|------------------------------------------------------|
| <i>PANEL A.- Linear association assumption</i>    |                                                  |                                                  |                                                                       |                                                         |                                                                  |                                                      |
| Ischemic heart disease                            | ---                                              | 1.01 (0.89-1.13)                                 | 0.99 (0.89-1.11)                                                      | 1.88 (0.42-8.28)                                        | 1.02 (0.97-1.07)                                                 | 0.96 (0.69-1.33)                                     |
| Cerebrovascular disease                           | 0.99 (0.89-1.10)                                 | 1.04 (0.92-1.17)                                 | 1.02 (0.94-1.12)                                                      | 1.25 (0.26-6.14)                                        | 1.00 (0.96-1.04)                                                 | 1.11 (0.83-1.50)                                     |
| Overall vascular disease                          | ---                                              | 1.03 (0.94-1.11)                                 | 1.01 (0.95-1.08)                                                      | 1.60 (0.55-4.64)                                        | 1.01 (0.98-1.04)                                                 | 1.05 (0.84-1.31)                                     |
| Overall mortality                                 | 1.01 (0.94-1.08)                                 | 1.00 (0.94-1.07)                                 | 1.01 (0.96-1.06)                                                      | 1.21 (0.53-2.75)                                        | 1.01 (0.98-1.03)                                                 | 1.02 (0.88-1.19)                                     |
| <i>PANEL B.- Nonlinear association assumption</i> |                                                  |                                                  |                                                                       |                                                         |                                                                  |                                                      |
|                                                   | Strain ≤ 0.09<br>HR (95% CI)<br>(per 0.01 units) | Strain > 0.09<br>HR (95% CI)<br>(per 0.01 units) |                                                                       |                                                         |                                                                  |                                                      |
| Ischemic heart disease                            | 0.97 (0.69-1.36)                                 | 1.13 (0.98-1.30)                                 |                                                                       |                                                         |                                                                  |                                                      |
| Overall vascular disease                          | 0.91 (0.73-1.14)                                 | 1.07 (0.92-1.23)                                 |                                                                       |                                                         |                                                                  |                                                      |

CI, confidence interval; HR, hazard ratio.

Adjusted for age, sex, body mass index, smoking, diabetes, systolic blood pressure, diastolic blood pressure, low density lipoprotein cholesterol, high density lipoprotein cholesterol, triglycerides. Competing risk: non-cardiovascular mortality as a competing event for ischemic heart disease and cerebrovascular disease, ischemic heart disease mortality as a competing event for cerebrovascular diseases, and cerebrovascular disease mortality as a competing event for ischemic heart disease.

Panel A: a linear association assumption is considered for all the indices.

Panel B: analysis of the association between strain and global vascular disease/ischemic heart disease was segmented according to the knot at which a change in the linear dose-response is observed (0.09), and strain is considered as a continuous variable in each of the defined segments, assuming a linear risk in each of the segments.

**Table 6 of the supplementary data.** Multivariate adjusted association between each of the carotid stiffness indices and the outcomes of interest considering competing risk in men

|                                                   | Strain<br><br>HR (95 % CI)<br>(per 0.01 units)   | Stiffness<br><br>HR (95%CI)<br>(per 1 unit)      | Peterson<br>elasticity<br>coefficient<br>HR (95%CI)<br>(per 10 units) | Compliance<br>coefficient<br>HR (95%CI)<br>(per 1 unit) | Distensibility<br>coefficient<br>HR (95%CI)<br>(per 0.001 units) | Pulse wave<br>velocity<br>HR (95%CI)<br>(per 1 unit) |
|---------------------------------------------------|--------------------------------------------------|--------------------------------------------------|-----------------------------------------------------------------------|---------------------------------------------------------|------------------------------------------------------------------|------------------------------------------------------|
| <i>PANEL A.- Linear association assumption</i>    |                                                  |                                                  |                                                                       |                                                         |                                                                  |                                                      |
| Ischemic heart disease                            | ---                                              | 0.98 (0.84-1.14)                                 | 1.00 (0.89-1.12)                                                      | 1.89 (0.72-4.93)                                        | 1.02 (0.98-1.06)                                                 | 0.95 (0.68-1.33)                                     |
| Cerebrovascular disease                           | 0.81 (0.71-0.93)                                 | 1.15 (1.07-1.24)                                 | 1.13 (1.06-1.21)                                                      | 0.26 (0.06-1.03)                                        | 0.92 (0.88-0.97)                                                 | 1.51 (1.25-1.82)                                     |
| Overall vascular disease                          | ---                                              | 1.07 (0.99-1.16)                                 | 1.08 (1.02-1.14)                                                      | 0.99 (0.42-2.33)                                        | 0.99 (0.95-1.02)                                                 | 1.20 (1.00-1.45)                                     |
| Overall mortality                                 | 1.01 (0.95-1.08)                                 | 0.99 (0.93-1.06)                                 | 1.00 (0.95-1.05)                                                      | 1.13 (0.64-2.01)                                        | 1.00 (0.98-1.02)                                                 | 1.04 (0.90-1.21)                                     |
| <i>PANEL B.- Nonlinear association assumption</i> |                                                  |                                                  |                                                                       |                                                         |                                                                  |                                                      |
|                                                   | Strain ≤ 0.09<br>HR (95% CI)<br>(per 0.01 units) | Strain > 0.09<br>HR (95% CI)<br>(per 0.01 units) |                                                                       |                                                         |                                                                  |                                                      |
| Ischemic heart disease                            | 0.79 (0.57-1.11)                                 | 1.16 (1.02-1.33)                                 |                                                                       |                                                         |                                                                  |                                                      |
| Overall vascular disease                          | 0.78 (0.64-0.95)                                 | 1.12 (1.00-1.26)                                 |                                                                       |                                                         |                                                                  |                                                      |

CI, confidence interval; HR, hazard ratio.

Adjusted for age, sex, body mass index, smoking, diabetes, systolic blood pressure, diastolic blood pressure, low density lipoprotein cholesterol, high density lipoprotein cholesterol, triglycerides. Competing risk: noncardiovascular mortality as a competing event for ischemic heart disease and cerebrovascular disease, ischemic heart disease mortality as a competing event for cerebrovascular diseases, and cerebrovascular disease mortality as a competing event for ischemic heart disease.

Panel A: a linear association assumption is considered for all the indices.

Panel B: analysis of the association between strain and global vascular disease/ischemic heart disease was segmented according to the knot at which a change in the linear dose-response is observed (0.09), and strain is considered as a continuous variable in each of the defined segments, assuming a linear risk in each of the segments.



**Figure 1 of the supplementary data.** The 3 patterns shown in the dose-response association between carotid artery stiffness indices and the outcomes of interest.

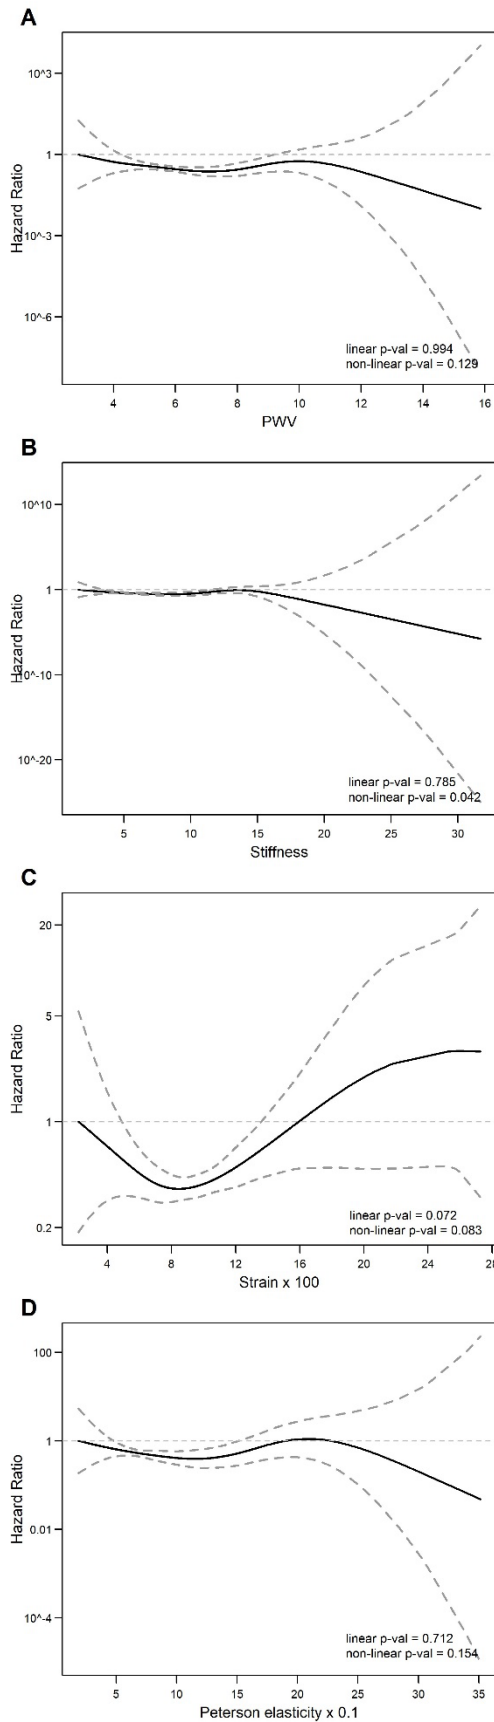

Supplement: mmc1 [file mmc1.pdf]
